# Supplementary material for: Polyhydroxyalkanoate (PHA) Granules Have no Phospholipids
Source: PubMed Central journal article supplement (PMC4879537; doi:10.1038/srep26612), 2016-05-25
Supplement: srep26612-s1.pdf [file srep26612-s1.pdf]

## Suppl. Materials

### Polyhydroxyalkanoate (PHA) Granules Have no Phospholipids

Stephanie Bresan<sup>1</sup>, Anna Sznajder<sup>1</sup>, Waldemar Hauf<sup>2</sup>, Karl Forchhammer<sup>2</sup>, Daniel Pfeiffer<sup>3</sup> and Dieter Jendrossek<sup>1</sup>

<sup>1</sup>*Institute of Microbiology, University Stuttgart, Germany*

<sup>2</sup>*Department of Organismic Interactions, Eberhard Karls Universität Tübingen, Germany*

<sup>3</sup>*Lehrstuhl für Mikrobiologie, Universität Bayreuth, Germany*

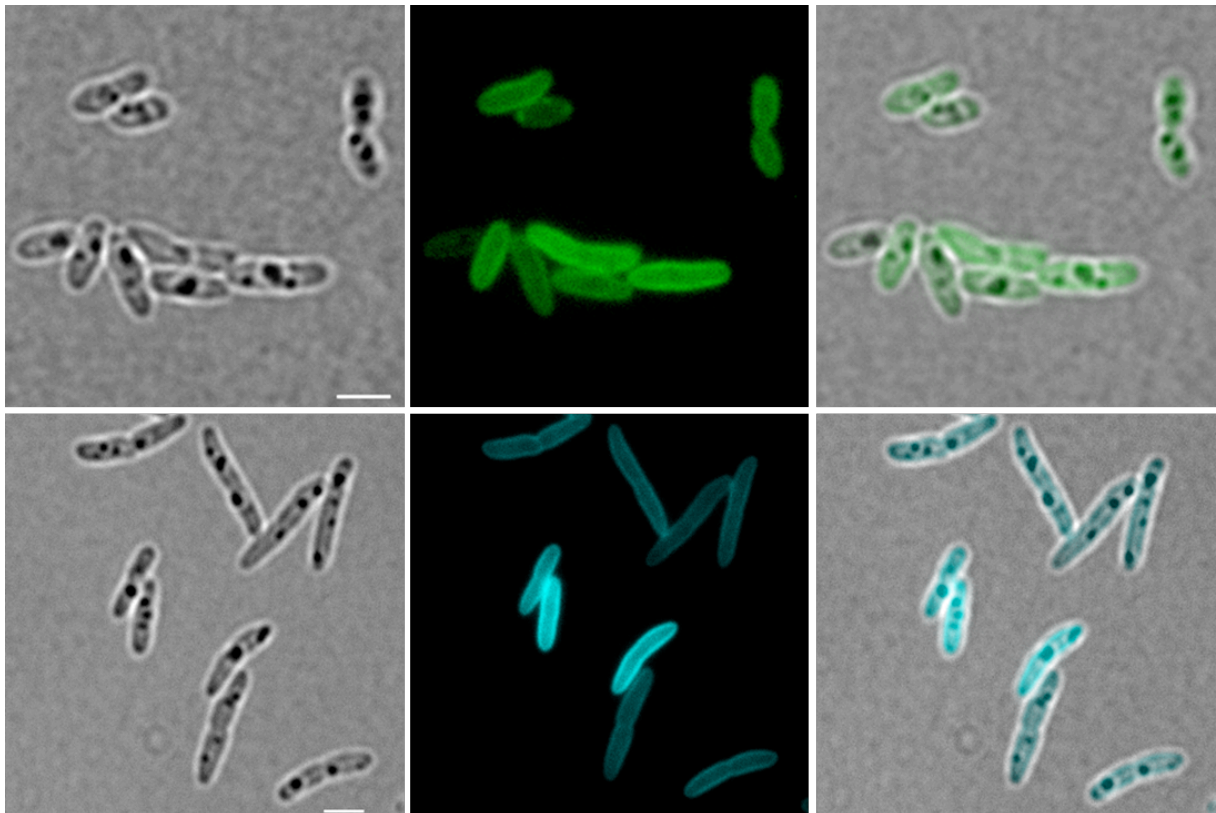

**Suppl. Fig. S1: Expression of sfGFP-LactC2 and mTurquoise2-LactC2 in *R. eutropha*.**

Cells were grown under PHB permissive conditions. From left to right: bright field, green (top middle) or turquoise (bottom middle) channel, merge. Scale bars correspond to 2  $\mu$ m. No co-localization of sfGFP-LactC2 or mTurquoise2-LactC2 with PHB granules that are visible in bright field.

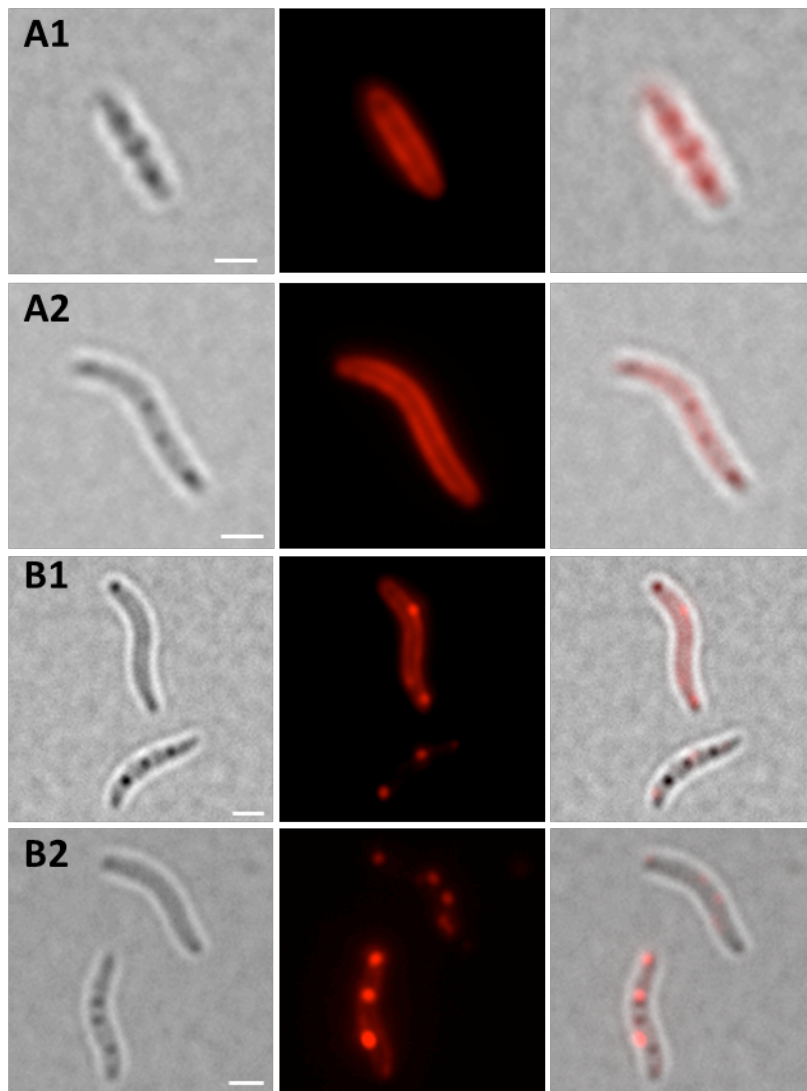

**Suppl. Fig. S2: Expression of DsRed2EC-LactC2 in magnetosome-free *M. gryphiswaldense*  $\Delta mamAB$  mutant.** Cells showing membrane-bound DsRed2EC-LactC2 fluorescence but no filament-like fluorescence (**A1 and A2**). Cells focussed to foci of DsRed2EC-LactC2 fluorescence (**B1 and B2**). Note, presence of several globular inclusions in bright field (PHB granules) in all images that do not co-localize with DsRed2EC-LactC2 fluorescence. From left to right: bright field, fluorescence channel, merge. Scale bars correspond to 2  $\mu\text{m}$ .

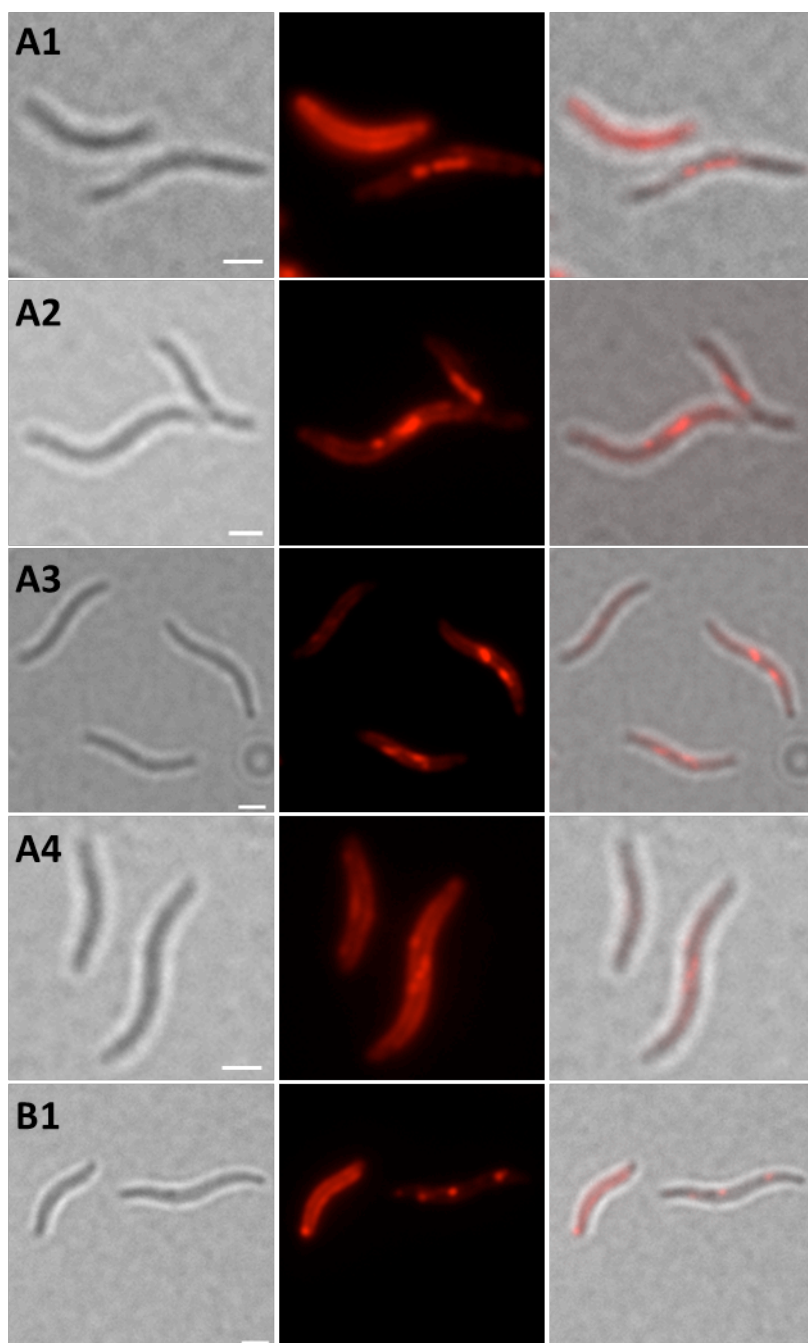

**Suppl. Fig. S3: Expression of DsRed2EC-LactC2 in PHB granule-free *M. gryphiswaldense*  $\Delta$ *phaCAB* mutant.** Cells focussed to filament-like dsRed2EC-LactC2 fluorescence resembling magnetosome chains (**A1-A4**). Cell focussed to cell membrane-bound DsRed2EC-LactC2 fluorescence and foci of DsRed2EC-LactC2 fluorescence (**B1**). Note, absence of any globular inclusions in bright field (PHB granules). From left to right: bright field, fluorescence channel, merge. Scale bars correspond to 2  $\mu$ m.

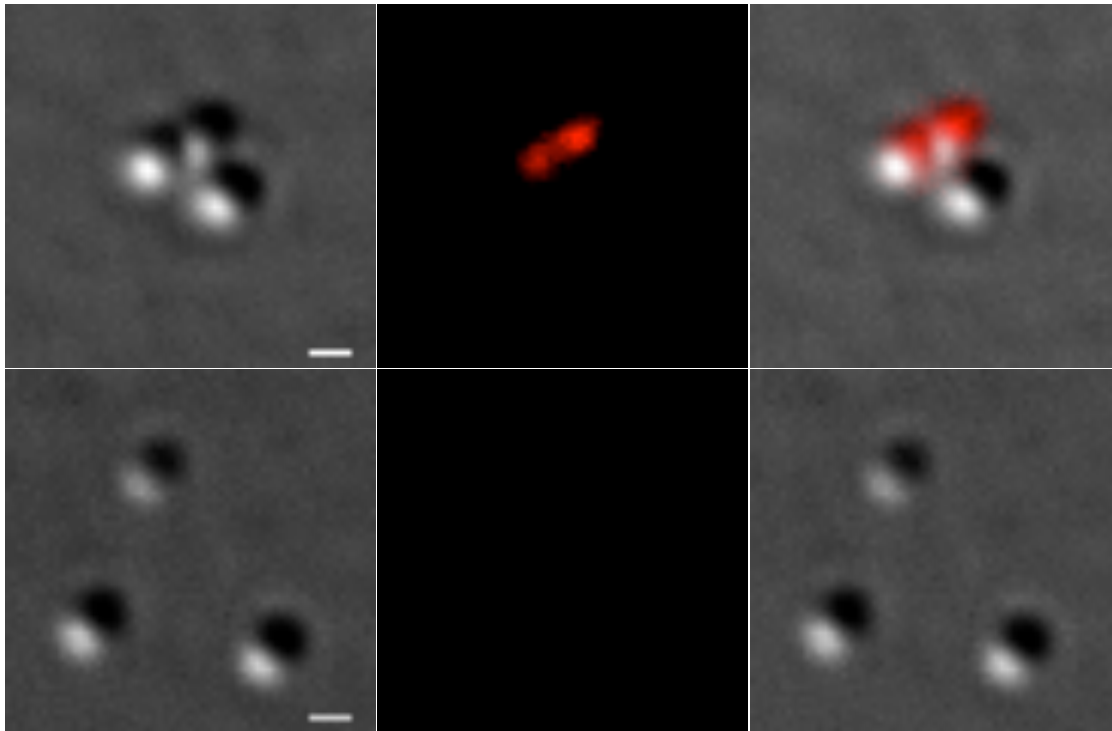

**Suppl. Fig. S4: PHB granules isolated from *R. eutropha* H16 cells.** PHB granules isolated from *R. eutropha* H16 cells expressing DsRed2EC-LactC2 are shown in the top row. In the bottom row, PHB granules isolated from *R. eutropha* H16 cells expressing DsRed2EC alone are shown. DIC (left), red channel (middle), overlay (right). Scale bars correspond to 0.5  $\mu\text{m}$ .

**Suppl. Table S5: Primers used for construction of gene fusions**

| plasmid                                              | primer for amplification of inserts                                                                                                                                                                                                                                                                                                                                                                                                                                                                                                                                                                                                                                                                                                                                                                                          |
|------------------------------------------------------|------------------------------------------------------------------------------------------------------------------------------------------------------------------------------------------------------------------------------------------------------------------------------------------------------------------------------------------------------------------------------------------------------------------------------------------------------------------------------------------------------------------------------------------------------------------------------------------------------------------------------------------------------------------------------------------------------------------------------------------------------------------------------------------------------------------------------|
| pBBR1MCS-2-<br><i>P<sub>phaC</sub>-eyfp-c1-psd</i>   | <b>eYFP-Psd-for:</b> ccgctcgaggcatgaactatcctcatccgctgatcgcc<br><b>eYFP-Psd-rev:</b> cgggatcctcacttcacgtcgagttcggcgaggatg                                                                                                                                                                                                                                                                                                                                                                                                                                                                                                                                                                                                                                                                                                     |
| pCM62- <i>P<sub>phaC</sub>-dsRed2-c1</i>             | <b>DsRed2EC-for:</b> ggggaattccatagggcgagcagtgagaacatcatcacc<br><b>DsRed2EC-rev:</b> ggactagttgatcagttatctagatccgggtggatcc                                                                                                                                                                                                                                                                                                                                                                                                                                                                                                                                                                                                                                                                                                   |
| pCM62- <i>P<sub>phaC</sub>-dsRed2EC-c1-lactC2</i>    | <b>LactC2-for:</b> cccaagcttcatgcactgaacccctaggcc<br><b>LactC2-rev:</b> ggactagtttaacagcccagcagctcc                                                                                                                                                                                                                                                                                                                                                                                                                                                                                                                                                                                                                                                                                                                          |
| pETDuet-<br><i>phaCcrAB</i><br><i>venlactC2</i>      | <b>PhaA-for:</b> gggatcactctcggcatggacgagctgtacaagtgacgcttgcatgagtgccgg<br><b>PhaB-rev:</b> gaattcggatcctggctgtggtgatgatggatggctgctgctcagccatgtgcaggccg<br><b>PhaC- Cerulean-for:</b> ccctctagaataatTTTgTTTaaactttaagaaggagatataccatggcgaccggcaaagg<br><b>PhaC- Cerulean-rev:</b> gctaccgctgccacttctgatccgctacctgcttggctttgacgtatcgcc<br><b>Venus-Lact-for:</b> cccatcttagtatattagtttaagtataagaaggagatatacatatggtgagcaagggcgagg<br><b>Venus-Lact-rev:</b> cttcaggcctaggggttcagtgcaattgtacagctcgtccatgccgag<br><b>ReCr-for:</b> gtcaaagccaaggcaggttagcggatcaggaagtgccagcggttagcgtgagcaagggcgaggagctgttc<br><b>ReCr-rev:</b> ccggcactcatcaagcgtcacttgtacagctcgtccatg<br><b>LactC2-for:</b> ctcgcatggacgagctgtacaagtgcaactgaacccctaggcctgaag<br><b>LactC2-rev:</b> gtcagcgatcgctggccggccgatccaattgagatctgcttaacagcccagcagctccac |
| pCM62- <i>P<sub>phaC</sub>-mTurquoise2-c1-lactC2</i> | <b>mmTurq2-LactC2-for:</b> ccatgcaaagtgccggccaggccaatgcccggagccggttcgaatagtgacggcagagagacaatcaacatagagcaagggcgaggagctg<br><b>mTurq2-LactC2-rev:</b><br>gggatggtattatccttcaggcctaggggttcagtgcatgaagcttgagctcgagatctttatatactgctccataccaag                                                                                                                                                                                                                                                                                                                                                                                                                                                                                                                                                                                     |
| pCM62- <i>P<sub>phaC</sub>-sfGFP-c1-lactC2</i>       | <b>sfGFP-LactC2-for:</b><br>ccatgcaaagtgccggccaggccaatgcccggagccggttcgaatagtgacggcagagagacaatcaacatagggatcaaaaggtgaag<br>aattatttac<br><b>sfGFP-LactC2-rev:</b><br>tggatattatccttcaggcctaggggttcagtgcatgaagcttgagctcgagatctttatataattcatccataccatgtg                                                                                                                                                                                                                                                                                                                                                                                                                                                                                                                                                                         |
| pBAM- <i>P<sub>mamDC</sub>-dsRed2EC-c1-lactC2</i>    | <b>DsRed2EC-LactC2-for:</b> ggggaattccatagggcgagcagtgagaacatcatcacc<br><b>DsRed2EC-LactC2-rev:</b> ggggaattcgctagcttaacagcccagcagctccactcg                                                                                                                                                                                                                                                                                                                                                                                                                                                                                                                                                                                                                                                                                   |

**Suppl. Table S6: Amino acid sequences of constructed fusion proteins**

**DsRed2EC-LactC2:**

MASSENIITEFMRFKVRMEGTVNGHEFEIEGEGEGRPYEGHNTVCLKVTKGGPLPFAWDILSPQFQYGSK  
VYVKHPADIPDYKLSFPEGFKWERVMNFEDGGVATVTQDSSLQDGCIFYKVKFIGVNFPSDGPVMQKK  
TMGWEASTERLYPRDGVKGETHKALKLKDGGHYLVEFKSIYMAKKPVQLPGYYYYDAKLDITSHNEDYT  
IVEQYERTEGRHHLFLRSRAQASCTEPLGLKDNTIPNKQITASSYYKTWGLSAFSWFPYYARLDNQGKFNA  
WTAQTNASASEWLQIDLGSQKRVTGIITQGARDFGHIQYVAAYRVAYGDDGVTWTEYKDPGASESKIFPG  
NMDNNSHKKNIFETPFQARFVRIQPVAWHNRITLRVLLGC

**sfGFP-LactC2:**

MASKGEELFTGVVPIVVELDGDVNGHKFSVRGEGEGDATNGKLTCLKFICTTGKLPVPWPPTLVTTLYGVQ  
CFSRYPDHMKRHDFFKSAMPEGYVQERTISFKDDGTYKTRAEVKFEGDTLVNRIELKGIDFKEDGNILGHK  
LEYNFNSHNVYITADKQKNGIKANFKIRHNVEDGVSQVLADHYQQNTPIGDGPVLLPDNHLYSTQSVLSKD  
PNEKRDHMLLEFVTAAGITHGMDELYKRSRAQASCTEPLGLKDNTIPNKQITASSYYKTWGLSAFSWFP  
YYARLDNQGKFNAWTAQTNASASEWLQIDLGSQKRVTGIITQGARDFGHIQYVAAYRVAYGDDGVTWTE  
YKDPGASESKIFPGNMDNNSHKKNIFETPFQARFVRIQPVAWHNRITLRVLLGC

**eYFP-Psd:**

MVSKGEELFTGVVPIVVELDGDVNGHKFSVSGEGEGDATYGKLTCLKFICTTGKLPVPWPPTLVTTFGYGLQC  
FARYPDHMKQHDFFKSAMPEGYVQERTIFFKDDGNYKTRAEVKFEGDTLVNRIELKGIDFKEDGNILGHK  
LEYNFNSHNVYIMADKQKNGIKVNFKIRHNIEDGVSQVLADHYQQNTPIGDGPVLLPDNHLYSYQSALS  
PNEKRDHMLLEFVTAAGITLGMDELYKSGLRSGMNYPHPLIAREGWPFAGAFVISLLVHASAGFWW  
ALPLWIITVFLQFFRDPPRPIPSQPNVAVLAPADGRIVVVEKTQDPYAGREALKISVFMNVFNVHSNRVSV  
DGAVEKVEYFPGKFNADMDKASVENERNAVLRRAADGQLVTLVQVAGLVARRILCYTKVGDNLRSRQ  
RYGFIRFGSRVDVYLPDARPRVTIGEKVSASSTILAEADV

**PhaC-Cerulean-PhaAB** (sequence of PhaA and PhaB not shown):

MATGKGAAASTQEGKSQPFKVTGPFDPATWLEWSRQWQGTEGNGHAAASGIPGLDALAGVKIAPA  
QLGDIQQRMYKDFSAWQAMAEGKAEATGPLHRRFAGDAWRTNLPYRFAAAFYLLNARALTELADA  
VEADAKTRQRIRFAISQWVDAMSPANFLATNPEAQRLLES GGESLRAGVRNMMEDLTRGKISQTESA  
FEVGRNVAVTEGAVVFENEYFQLLQYKPLTDKVHARPLLMVPPCINKYYILDLPESLVRHVVEQGHTVF  
LVSWRNPDASMAGSTWDDYIEHAAIRAIEVARDISGQDKINVLGFCVGGTIVSTALAVLAARGEHPAASV  
TLLTLLDFADTGILDVDFVDEGHVQLREATLGGGAGAPCALLRGLANTFSFLRPNDLVWNYVVDNYLK  
GNTPVPFDLLFWNGDATNLPGPWYCWYLRHTYLQNELKVPKLTVCVGPVDLASIDVPTYIYGSREDHIV  
PWTAAYASTALLANKLRFVLGASGHIAGVINPPAKNKRSHWTNDALPESPQQWLAGAIEHHGSWWPD  
WTAWLAGQAGAKRAAPANYGNARYRAIEPAPGRYVKAKAGSGSGSGSVSKGEELFTGVVPIVVELD  
DVNGHKFSVSGEGEGDATYGKLTCLKFICTTGKLPVPWPPTLVTTLTWGVQCFARYPDHMKQHDFFKSAM  
PEGYVQERTIFFKDDGNYKTRAEVKFEGDTLVNRIELKGIDFKEDGNILGHKLEYNASDNVYITADKQKNG  
IKANFKIRHNIEDGVSQVLADHYQQNTPIGDGPVLLPDNHLYSTQSKLSKDPNEKRDHMLLEFVTAAGITL  
GMDELYK

**Venus-LactC2:**

MVSKGEELFTGVVPIVVELDGDVNGHKFSVSGEGEGDATYGKLTCLKICTTGKLPVPWPPTLVTTLYGLQC  
FARYPDHMKQHDFFKSAMPEGYVQERTIFFKDDGNYKTRAEVKFEGDTLVNRIELKGIDFKEDGNILGHK  
LEYNFNSHNVYITADKQKNGIKANFKIRHNIEDGGVQVLADHYQQNTPIGDGPVLLPDNHLYSYQSKLSKD  
PNEKRDHMLLEFVTAAGITLGMDELYKCTEPLGLKDNTIPNKQITASSYYKTWGLSAFSWFPYYARLDN  
QGKFNAWTAQTNASASEWLQIDLGSQKRVTGIITQGARDFGHIQYVAAYRVAYGDDGVTWTEYKDPGA  
SESKIFPGNMDNNSHKKNIFETPFQARFVRIQPVAWHNRITLRVLLGC

**mTurquoise2-LactC2:**

MSKGEELFTGVVPILVELDGDVNGHKFSVSGEGEGDATYGKLT~~LFICTTGKLPVPWPTLVTTLSWGVQC~~  
FARYPDHMKQHDFFKSAMPEGYVQERTIFFKDDGNYKTRAEVKFEGDTLVNRIELKGIDFKEDGNILGHK  
LENYFSDNVYITADKQKNGIKANFKIRHNIEDGGVQLADHYQQNTPIGDGPVLLPDNHYLSTQSKLSKDP  
NEKRDHMLLEFVTAAGITLGMDELYK*RSRAQASCTEPLGLKDNTIPNKQITASSYYKTWGLSAFSWFPY*  
YARLDNQQGKFNAWTAQTNSASEWLQIDLGSQKRVGTGIITQGARDFGHIQYVAAYRVAYGDDGVTWTEY  
KDPGASESKIFPGNMDNNSHKKNIFETPFQARFVRIQPVAWHNRITLRVELLGC

**Amino acids coding for the fluorescent protein are indicated by coloured letters, amino acids of the linker region are shown in italic letters and amino acids of the protein of interest are indicated by non-italic black letters**
